# Supplementary material for: In situ thermosensitive H2O2/NO self-sufficient hydrogel for photothermal ferroptosis of triple-negative breast cancer
Source: Royal Society of Chemistry journal article supplement (doi:10.1039/d4nr02907k), 2024-01-01
Supplement: d4nr02907k1.pdf [file d4nr02907k1.pdf]

## ***In situ* Thermosensitive H<sub>2</sub>O<sub>2</sub>/NO Self-sufficient Hydrogel for Photothermal Ferroptosis of Triple Negative Breast Cancer**

Sri Amrutha Sankaranarayanan<sup>a</sup>, Kalyani Eswar<sup>a</sup>, Rupali Srivastava<sup>a</sup>, Ajinkya Madhukar Thanekar<sup>a</sup>, Mounika Gubige<sup>a</sup>, Veeresh Bantal<sup>b</sup> and Aravind Kumar Rengan<sup>a\*</sup>

### **SUPPORTING INFORMATION**

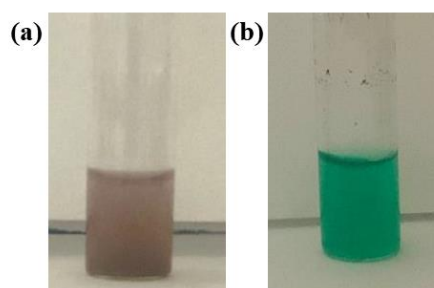

**Figure S1:** (a) IR806 dye directly added to CP NPs and (b) IR806 dye encapsulated through modified liposomes

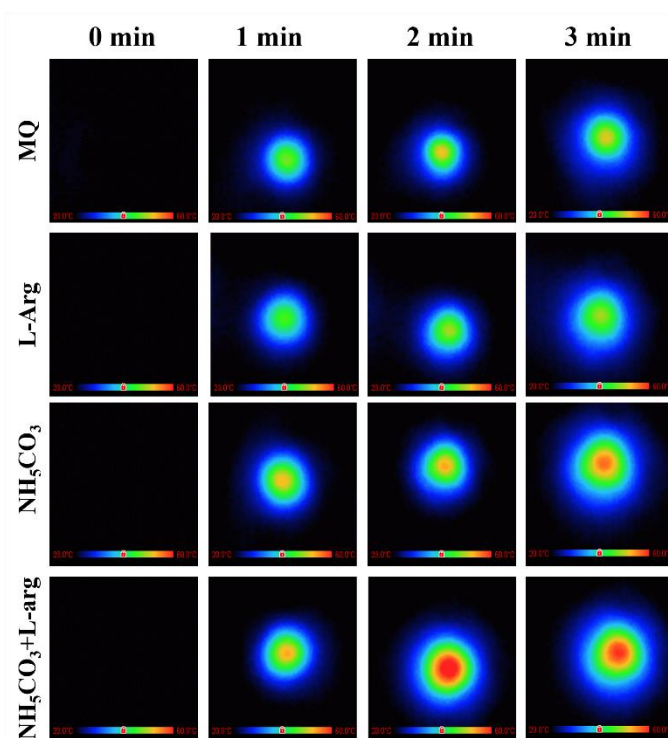

**Figure S2:** Representative thermal images of CPIR NPs synthesized in various hydration media

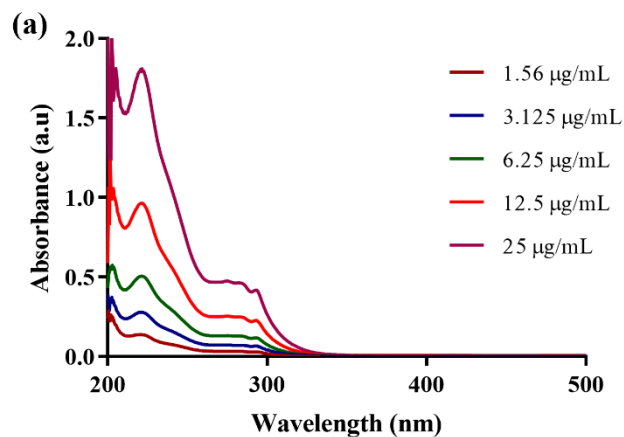

**Figure S3:** Standard curve for RSL-3

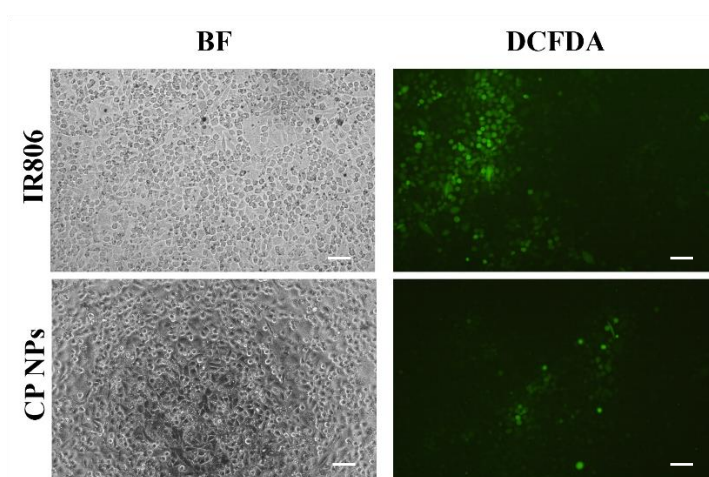

**Figure S4:** ROS generation in 4T1 cells treated with only IR806 and CP NPs upon NIR laser irradiation under normoxic conditions (Scale bar represents 100µm).

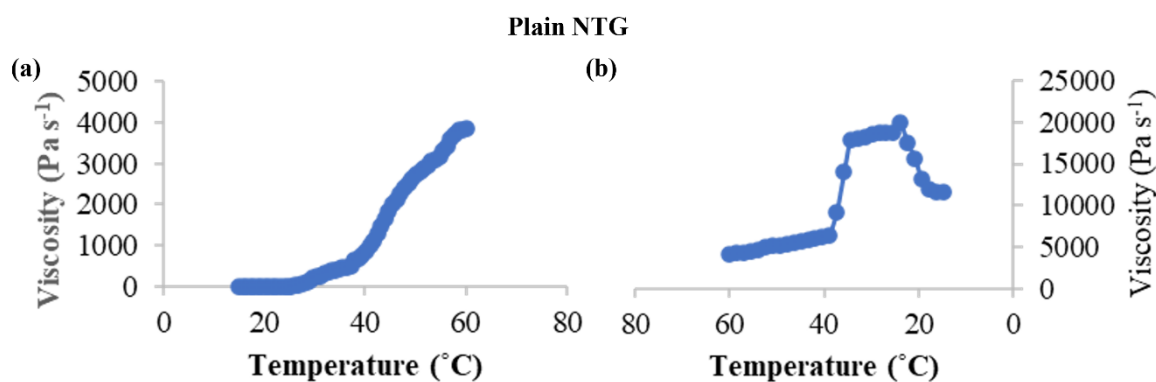

**Figure S5:** Rheological analysis of plain NTG without CP NPs. (a) Temperature-Viscosity graph and (b) Reverse sweep to confirm the irreversible cross-linking

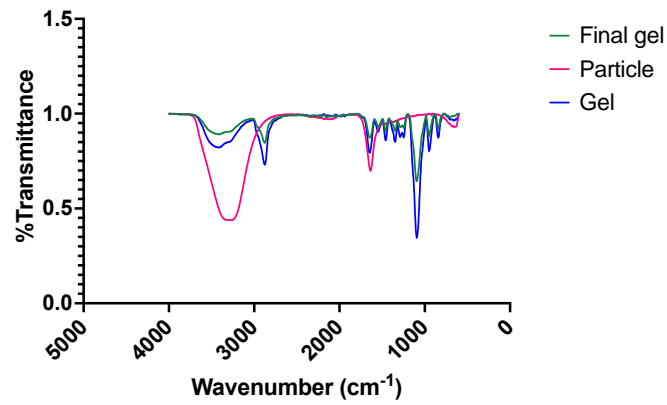

**Figure S6:** FTIR analysis of plain NTG and CPR-NTG

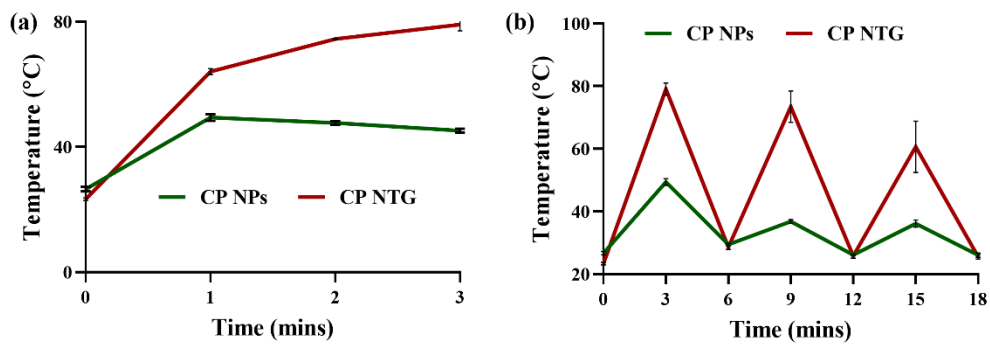

**Figure S7:** (a) Photothermal temperature rise and (b) Photothermal stability of CP NPs and CP NTG upon irradiation with 750nm laser.

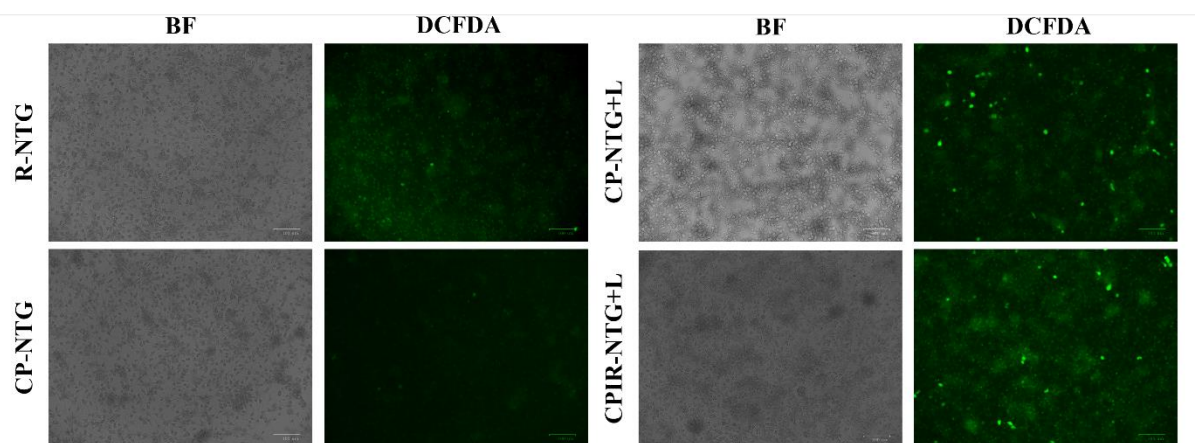

**Figure S8:** ROS generation in 4T1 cells treated R-NTG, CP NTG, CPNTG+L, CPIR NTG (Scale bar represents 100 $\mu$ m).

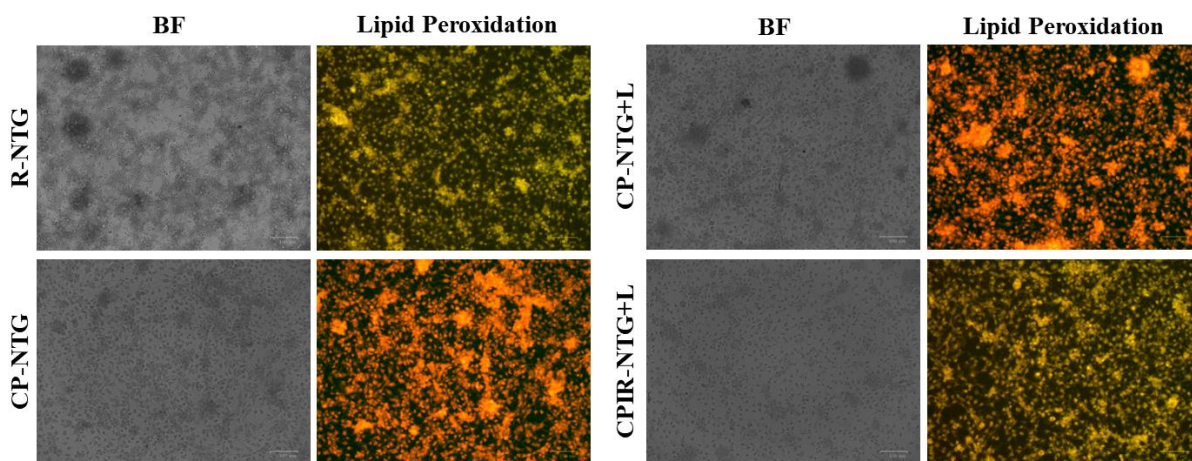

**Figure S9:** Lipid peroxidation in 4T1 cells treated R-NTG, CP NTG, CPNTG+L, CPIR NTG (Scale bar represents 100 $\mu$ m).

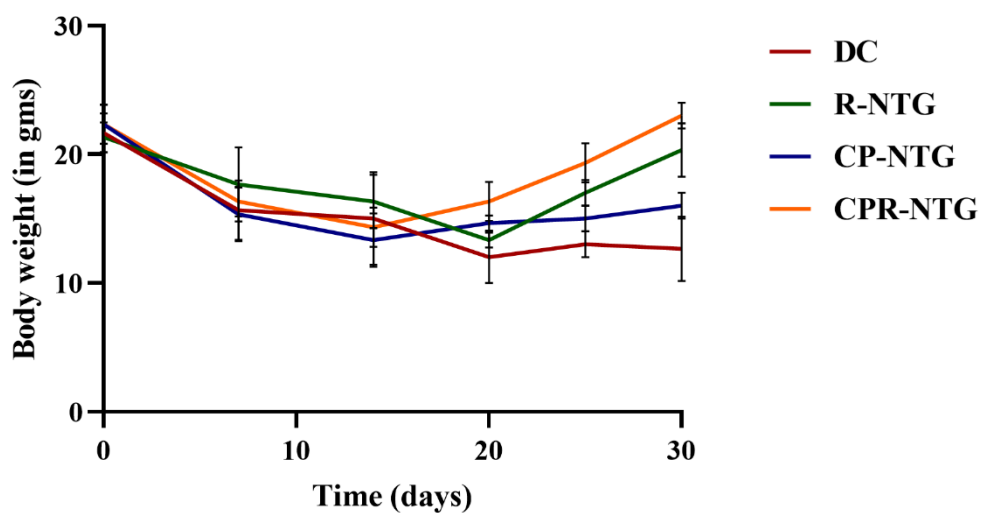

**Figure S10:** Changes in Body weight observed in mice during the treatment period.



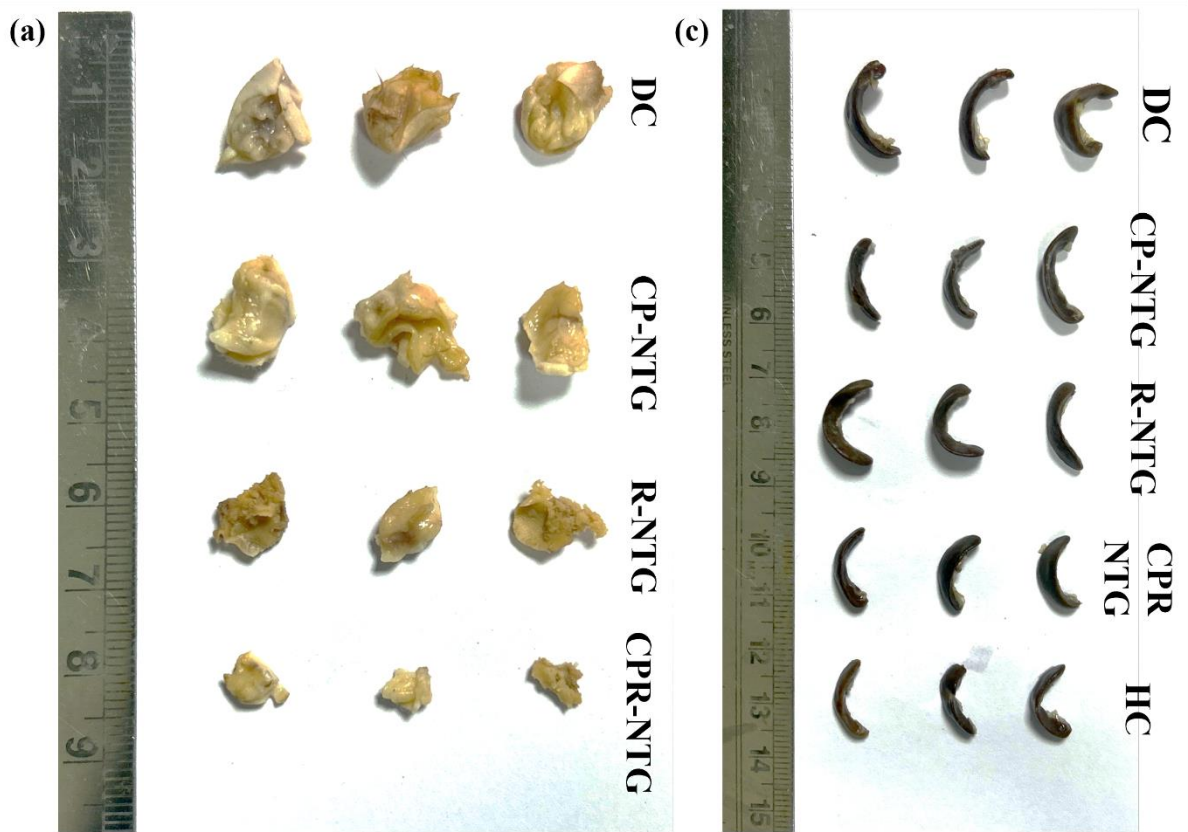

**Figure S11:** Excised (a) Tumors and (b) Spleen from mice treated with hydrogel sample and post-treatment period (n=3).

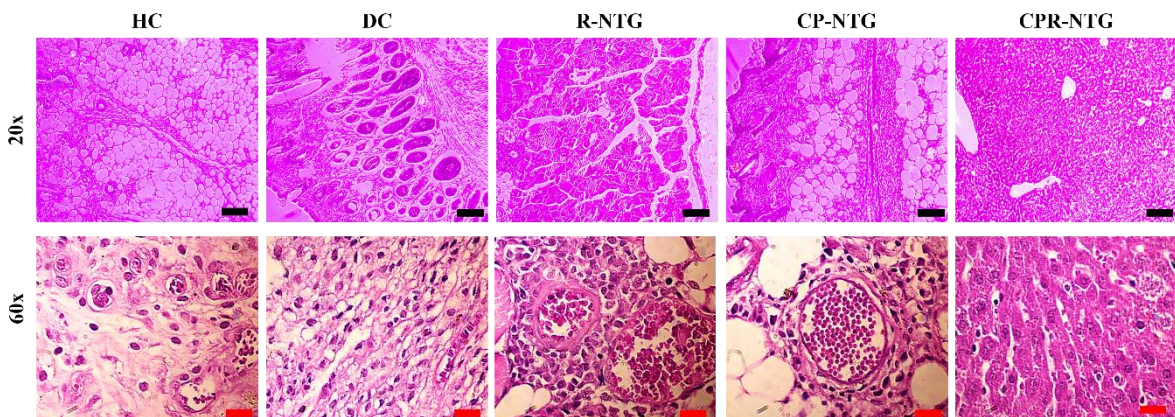

**Figure S12:** H&E staining of tumors excised from treated mice

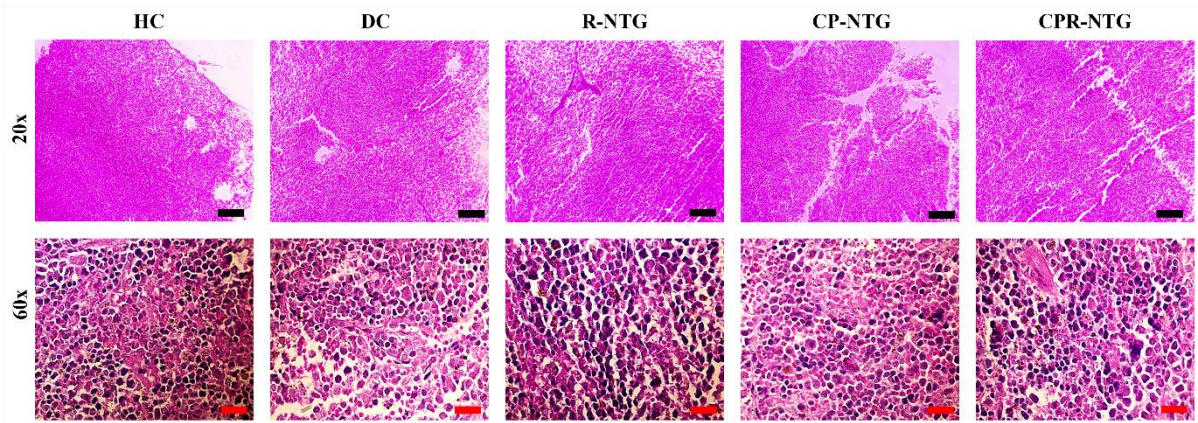

**Figure S13:** H&E staining of spleen excised from treated mice
